# Supplementary material for: Pyridinone Derivatives as Interesting Formyl Peptide Receptor (FPR) Agonists for the Treatment of Rheumatoid Arthritis
Source: MDPI journal article supplement (doi:10.3390/molecules26216583), 2021-10-30
Supplement: s1 [file s1]

Supplementary Materials for

# Pyridinone Derivatives as Interesting Formyl Peptide Receptor (FPR) Agonists for the Treatment of Rheumatoid Arthritis

Letizia Crocetti <sup>1</sup>, Claudia Vergelli <sup>1</sup>, Gabriella Guerrini <sup>1</sup>, Maria Paola Giovannoni <sup>1,\*</sup>, Liliya N. Kirpotina <sup>2</sup>, Andrei I. Khlebnikov <sup>3,4</sup>, Carla Ghelardini <sup>5</sup>, Lorenzo Di Cesare Mannelli <sup>5</sup>, Elena Lucarini <sup>5</sup>, Igor A. Schepetkin <sup>2</sup> and Mark T. Quinn <sup>2</sup>

<sup>1</sup>NEUROFARBA, Pharmaceutical and Nutraceutical Section, University of Florence, Via Ugo Schiff 6, 50019 Sesto Fiorentino, Italy.

<sup>2</sup>Department of Microbiology and Cell Biology, Montana State University, Bozeman, MT, USA

<sup>3</sup>National Research Tomsk Polytechnic University, 634050 Tomsk, Russia

<sup>4</sup>Scientific Research Institute of Biological Medicine, Altai State University, 656049 Barnaul, Russia

<sup>5</sup>NEUROFARBA, Pharmacology and Toxicology Section, University of Florence, Viale Pieraccini 6, 50139 Florence, Italy.

\* Correspondence: mariapaola.giovannoni@unifi.it; Tel +39-055-4573682; Fax +39-055-4573780

A)

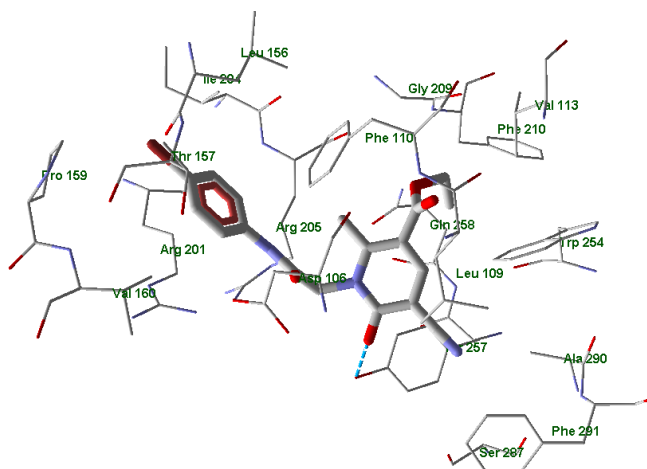

B)

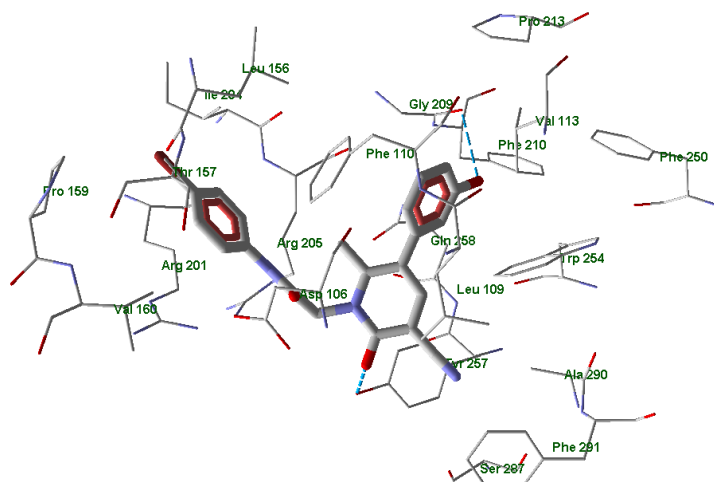

C)

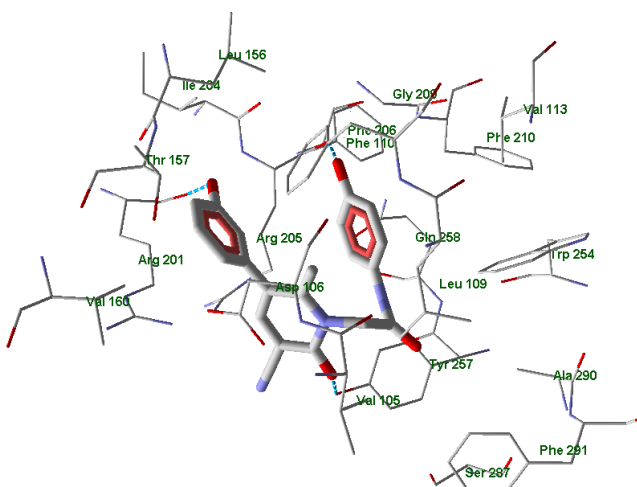

**Figure S1.** Docking poses of compounds **AMC4** (Panel A), **14a** (Panel B), and **14c** (Panel C) in FPR1 binding site. Residues within 4 Å from each pose are visible. Hydrogen bonds are shown in dashed blue lines. All the compounds are H-bonded to Tyr257 residue. Additionally, compound **14a** forms a hydrogen bond with Gly209, while **14c** is H-bonded to Arg201 and Arg205.



C)

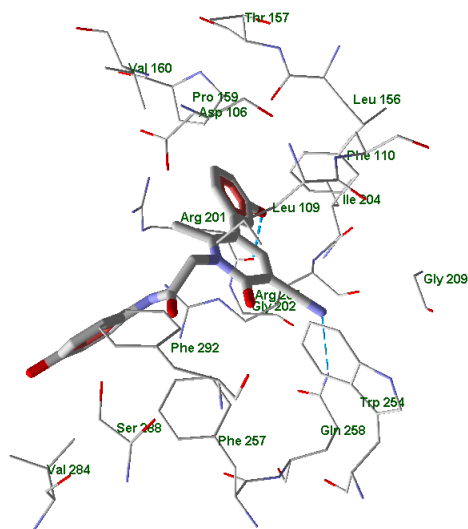

**Figure S2.** Docking poses of compounds **AMC4** (Panel **A**), **14a** (Panel **B**), and **14c** (Panel **C**) in FPR2 binding site (PDB entry 6OMM). Residues within 4 Å from each pose are visible. Compound **14a** forms hydrogen bonds with His102 and Arg205. Compounds **AMC4** and **14c** are H-bonded to Arg201 residue. Additionally, **AMC4** and **14c** form H-bonds with Asp106 and Gln258, respectively. Hydrogen bonds are shown in dashed blue lines.
